# Supplementary material for: Expression Analysis of PIN Genes in Root Tips and Nodules of Lotus japonicus
Source: PubMed Central journal article supplement (PMC6359356; doi:10.3390/ijms20020235), 2019-01-09
Supplement: ijms-20-00235-s001.pdf [file ijms-20-00235-s001.pdf]

# Expression analysis of *PIN* genes in root tips and nodules of *Lotus japonicus*

Izabela Sańko-Sawczenko <sup>1</sup>, Dominika Dmtruk <sup>1</sup>, Barbara Łotocka <sup>1</sup>, Elzbieta Rózańska <sup>1</sup> and Weronika Czarnocka <sup>1,\*</sup>

<sup>1</sup> Department of Botany, Faculty of Agriculture and Biology, Warsaw University of Life Sciences, Nowoursynowska 159, 02-776 Warsaw, Poland; izabela\_sanko\_sawczenko@sggw.pl (I.S.-S.); dominika\_dmtruk@sggw.pl (D.D.); barbara\_lotocka@sggw.pl (B.Ł.); elzbieta\_rozanska@sggw.pl (E.R.)

\* Correspondence: weronika\_czarnocka@sggw.pl; Tel.: +48-22-59-326-6

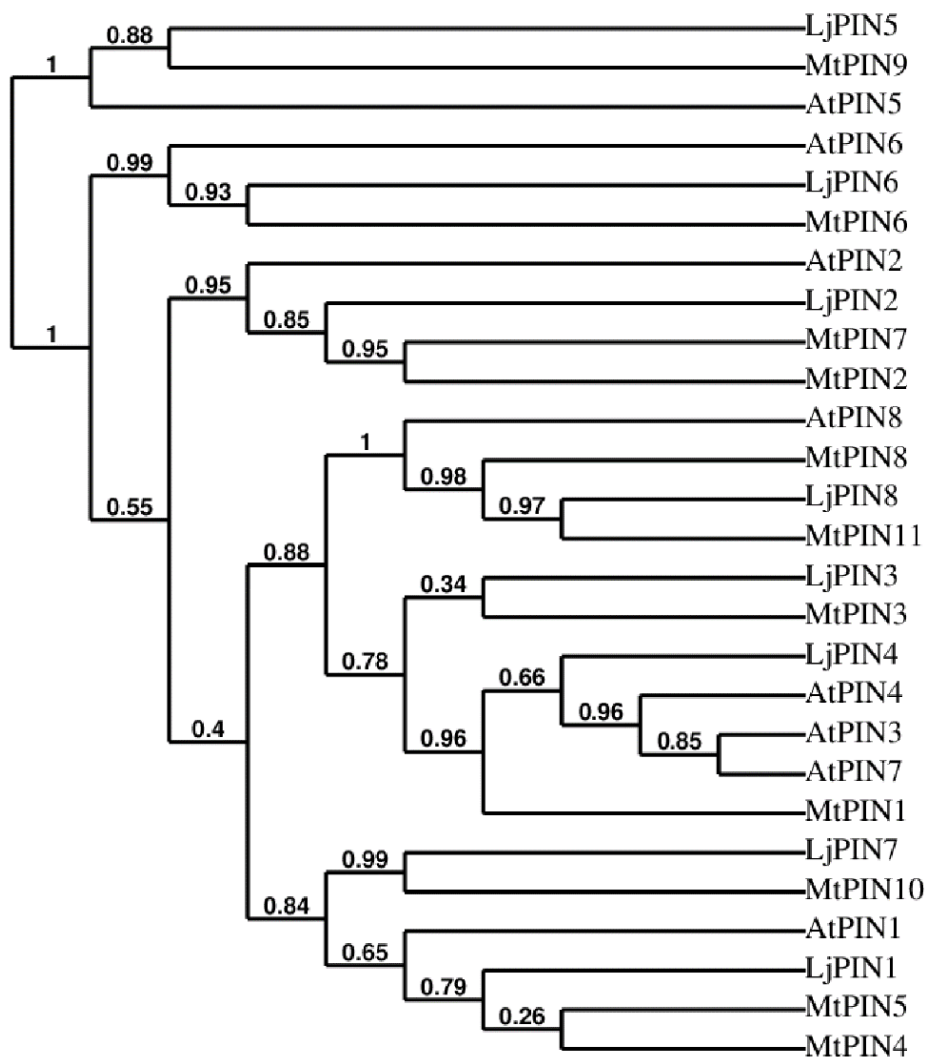

**Figure S1.** Cladogram presenting the phylogenetic relationship of PIN proteins from *L. japonicus* (Lj), *M. truncatula* (Mt) and *A. thaliana* (At).

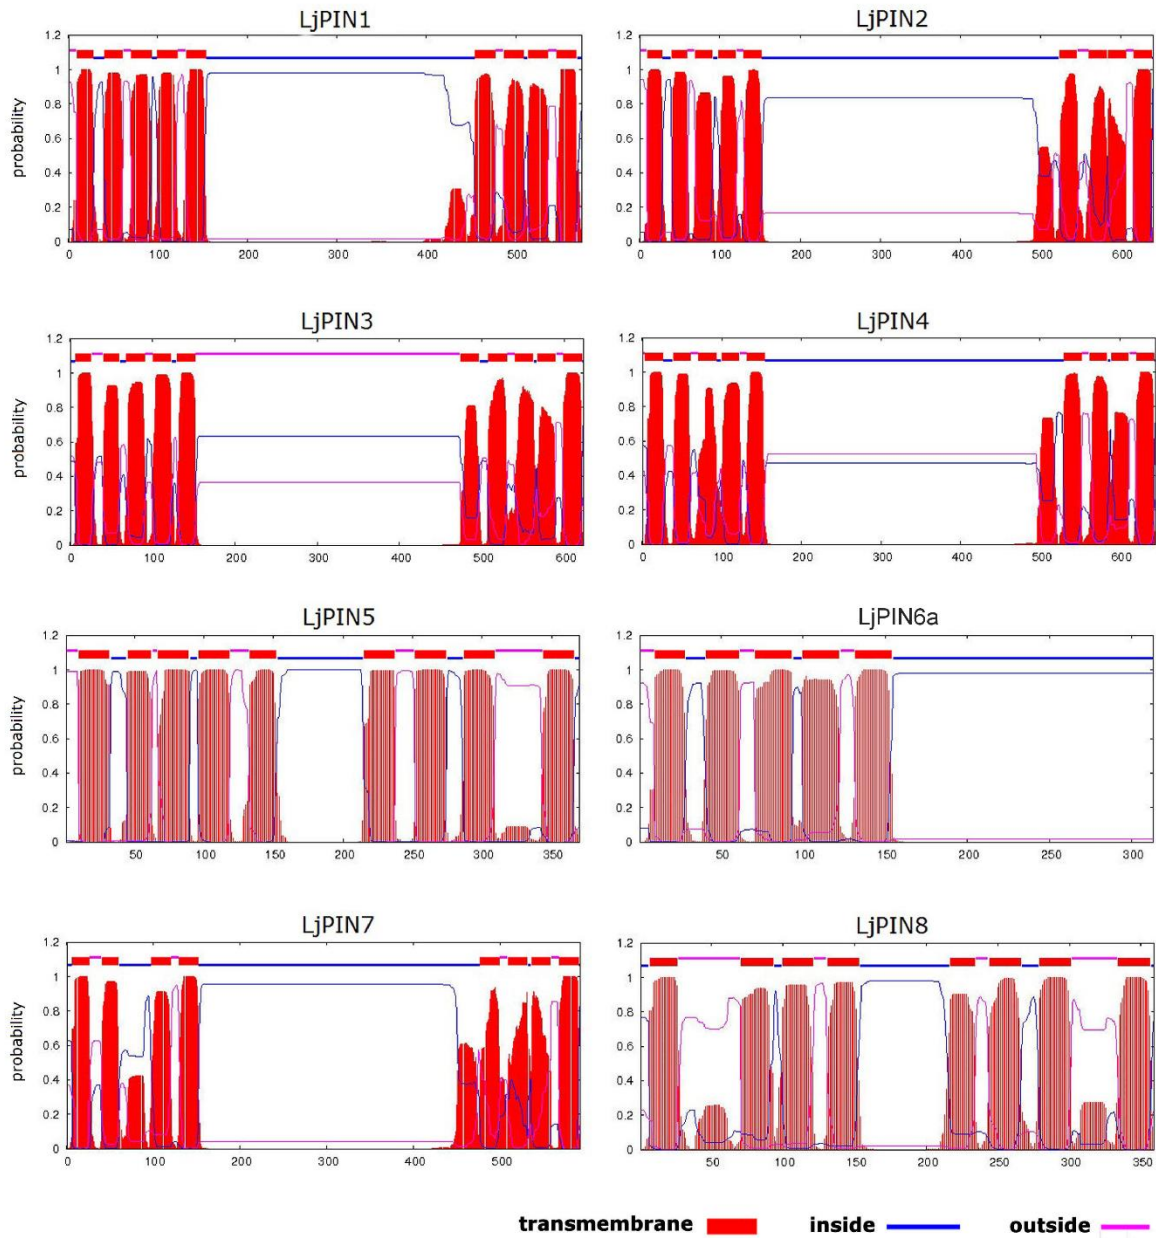

**Figure S2.** Transmembrane topology of *L. japonicus* PIN proteins. Red peaks represent transmembrane helices.

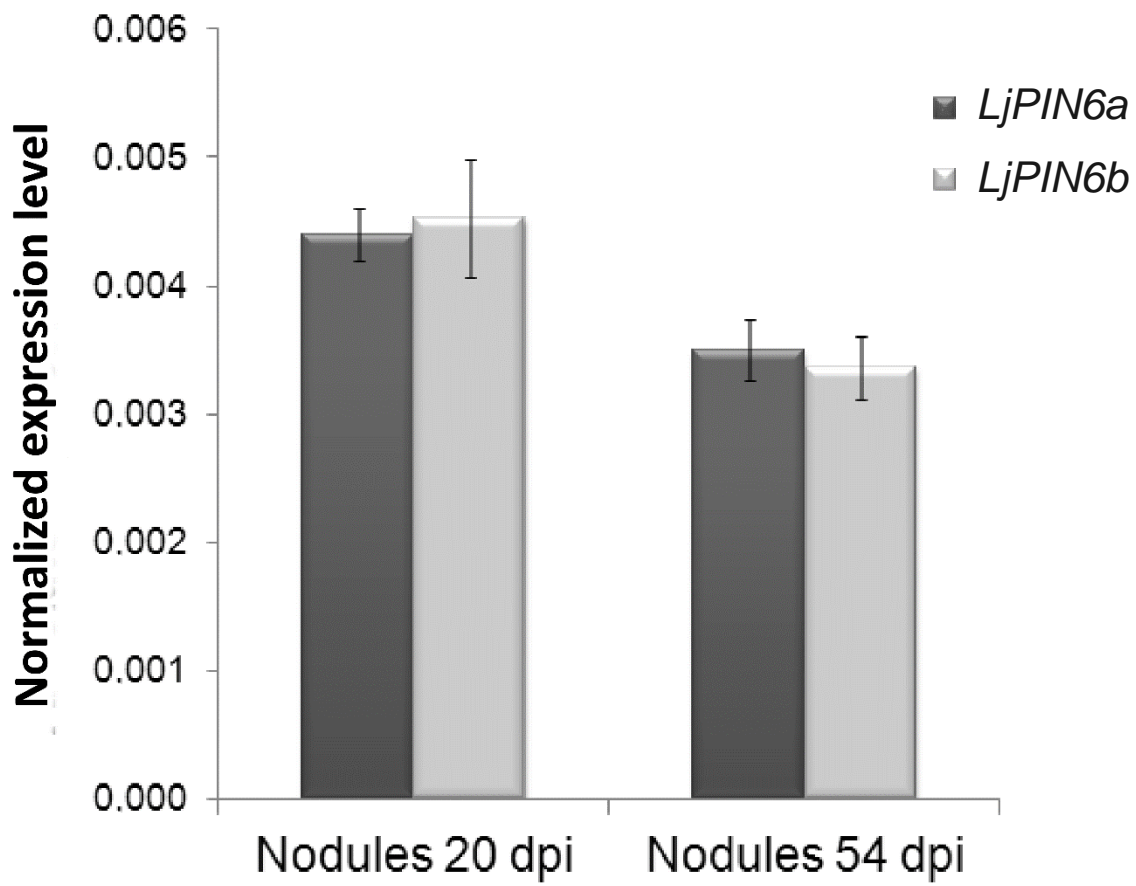

**Figure S3.** Normalized expression level of *LjPIN6a* and *LjPIN6b* in root nodules. Mean values ( $\pm$ SE) are derived from three biological replicates, for which three individual qPCR reactions were performed.

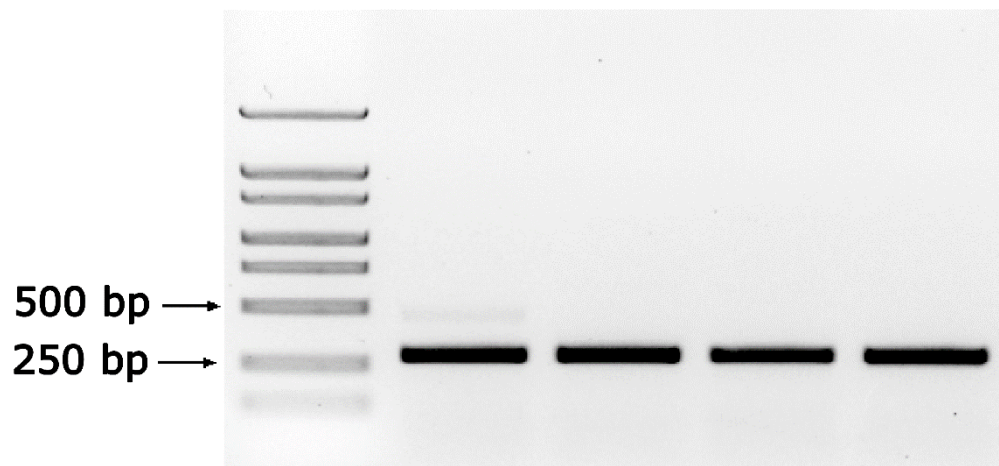

**Figure S4.** The electrophoretic separation of LjPIN6 fragment amplification products. bp- base pairs.

A

## LjPIN6 – complete coding sequence (CDS)

ATGGTTACAGGAGATGATTTGTACAACGTGATGTGCGCCATGGTGCC  
TCTATATTTTCGCAATGCTGGTAGCTTACGCATCAGTGAAATGGTGCA  
AAATGTTACCCACAGCAGTGTCCGGCGTCAACCGTTTCGTGGCG  
GTGTTTGGCATCCGGTCTCTCTTTCCATTTCAITTCATCAACAATC  
CTTATGAGATGGACGCTAAGTTCATCATAGCGGACACGCTCTCCAAG  
CTCGTCGTGCTGTTCTTCTCTCTCTGGGCTATTTTTTTGCTTCTG  
GATCTCTCGACTGGCTTATCACGCTCTTCTCGCTCGCAACCTTGCCCA  
ACACGCTTGTATGGGGATTCTCTACTCCAAGCCATGTACGGCCAA  
TTCACGCAAGGCCTCATGGTGCAACTCGTGTACTCCAATGCATCATA  
TGGTATACTTACTGTTGTTTCTATTGGAATACAGAGCAGCGACCCTT  
TTGATCAAAAACCGAGTCCCTGGGGACACGGCGGCGTCCATAACCAA  
AATCGAGGTCGACGGCGACGTGATTTCCCTCGACGGCCACGACGTGC  
CACTGCAACCGCAGTCGGAAACCGACACCCACGGCCGATCAGCGT  
GCGAATCCGGCGATCAATCTCTCAGCTCCGGACTCAACCTCATCAA  
TCGGCAACGCGTTATCACTCCAAGGCATTTCGAATCTACCAACGCC  
GAGCACCTGTCTGACGGCGACCCCTCTTTGGATACCCGCGGCGAG  
CCCGAGGTTATCCGGATGCGCTCTCCGACGCGTACTCGCTTACGCC  
CACGCCGCGGGCGTCAAAATTTCAATGAGACGGAGGTCACGGCGGGA  
ACGCCGGTATGGGGGAGGTCTCCGGTGGGCGGGGAGGGTTTCTCG  
GCAGATGTCGCCGGGGAAATGCCAAGTAGAAGAGAGACAG**GGATGC**  
**AAGGACATTACGCAGTCAGATAAAGAAATTAGCTTCAGAGACAAC**  
**ATCAAAGTTCA**AATGCCAGGGGAAGAAGCTGCAGACACAACCTGCCTC  
GTAACAGAAAAATGCCACATGCTTTTGTATGATAAGGCTTATACTT  
ACAGTAGTGGGAAGAAAAC**TTTC**CGCGTAACCCTAATACATATTCTAG  
TGTATTAGGACTTGTGGTCTCTAATCTCCTTCAAATGGAACATGGA  
AATGCCTAGTCTGATCAAAGCATCTATCAAATCATCTCGGATGCAA  
GCCTTGGAAATGGCTATGTTTAGCTTAGGGCTTTTCATGGCCCTCAGC  
CTCGTATCATTGCTTGTGGTACCAAAAAGAGCAGCCATGGGAATGGCC  
ATTCTGTTTCGTGTGCGGGCCTCTTGTAAATGTCAGCATCCTCCATTGTC  
ATTGGATTGAGAGGGGACAAATGCACACAGCAATTGTACAGGCTGC  
ACTTCCACAGGGGATTGACATTTGTATTTGCAAGGGAATATGGGC  
TGCATCCTGATATTTGAGCACAGGGGTTATCTTTGGCATGCTAGTAT  
CCTTACCAATAACTCTCTATATTACATACTTCTTGGCTTTGTA

## LjPIN6 – complete protein sequence

MVTGDDLYNVMCAMVPLYFAMLVAYASVKWCKMFTPQQCSGVNRFV  
AVFAIPVLSFHIFISINPYEMDAKFIIADTSLKLVVLFLLFLWAIFASFSL  
DWLITLFLSLATLNTLVMGIPLLQAMYGFQFTQGLMVQLVVLQCIWYTL  
LLFLLEYRAATLLIKTEFPDGAASITKIEVDGDVISLDGHDVPLQTQSET  
DTHGRISVRIRRSISSAPDSTSSIGNAVITPRHSNLTAEHLLDGDPSFGYP  
PASPRLSGCASSDAYSLOPTPRASNFNETEVTAGTPVWGRSPVGGGRVS  
RQMSPGKCQVEERQGC KDITQSDKEISFRDNIKVSMPGEEAADTTARNQ  
KMPHAFVMIRLILTVVGRKLSRNPNTYSSVLGLVWVSLISFKWNMEMPSL  
IKASIKIISDASLGMAMFSLGLFMALQPRIIACGTKRAAMGMAIRFVCGP  
LVMSASSIVIGLRGDKLHTAIVQAALPQGI VPFVFAREYGLHPDILSTGVI  
FGMLVSLPITLLYYILLGL-

B

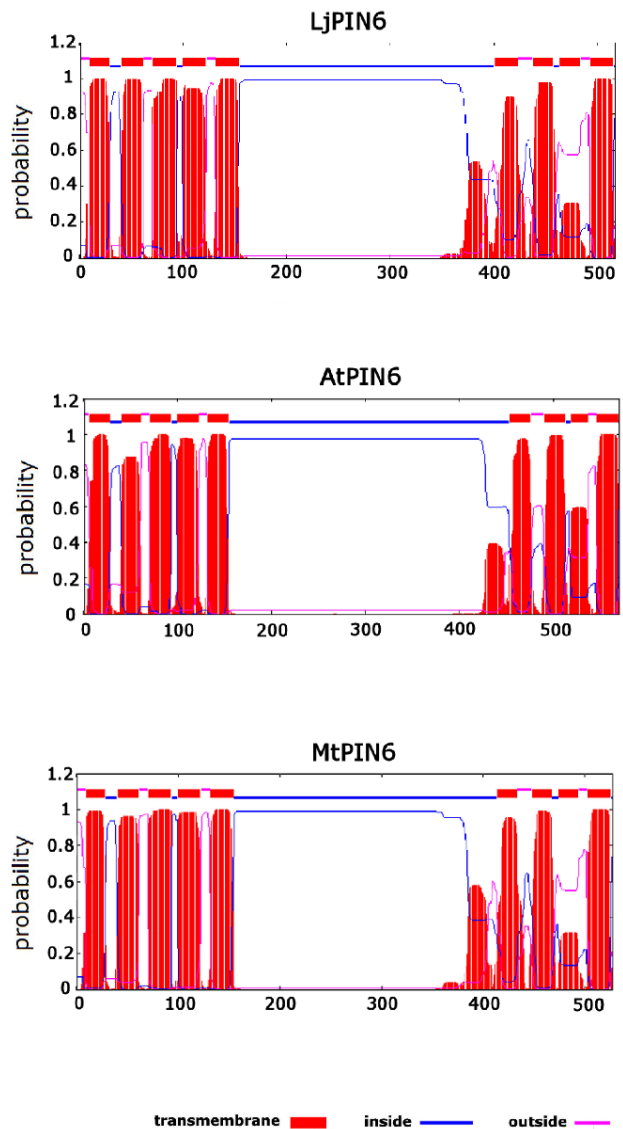

**Figure S5.** Complete sequence of LjPIN6 and its transmembrane domain topology. (A) LjPIN6 coding and protein sequence with the fragment obtained through the sequencing (bolded) and binding sites of primers used for sequencing (shaded). (B) Transmembrane domain topology of LjPIN6 and its orthologs from *A. thaliana* and *M. truncatula*. Red peaks represent transmembrane helices.

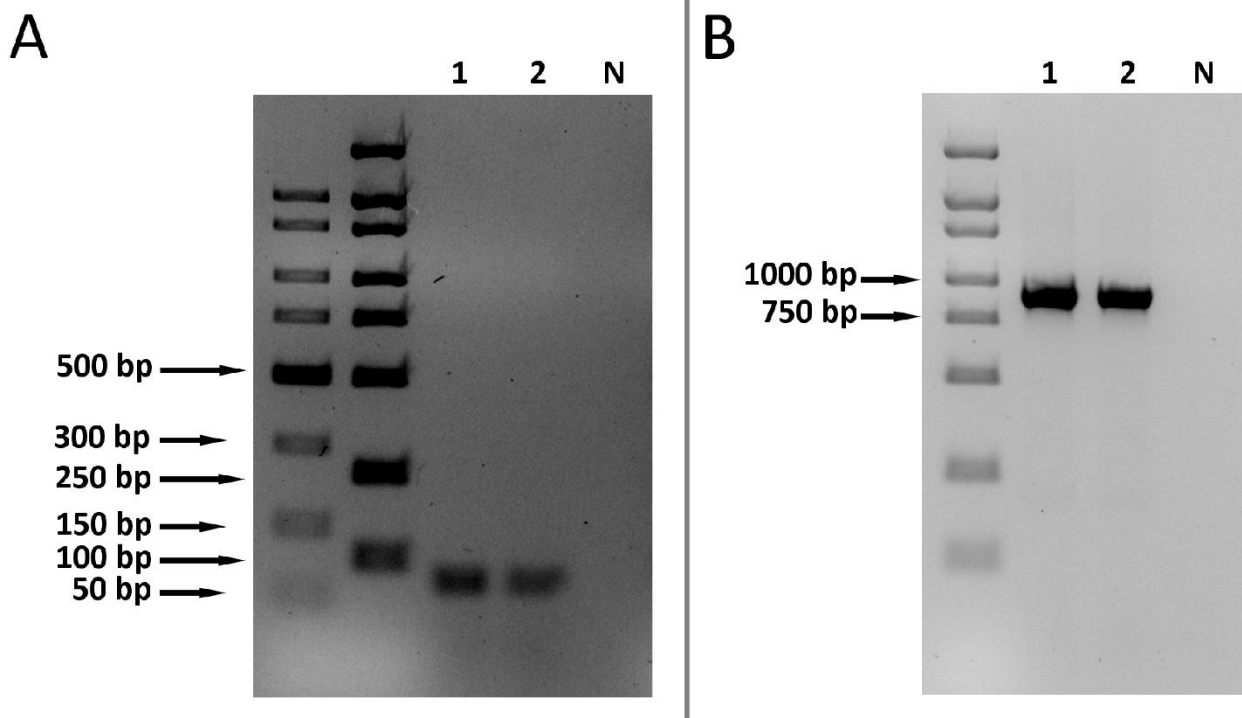

**Figure S6.** The electrophoretic separation of *LjPIN5* (A) and *LjPIN8* (B) products of amplification performed on genomic *L. japonicus* DNA template. Wells number 1 and 2 represent two biological repetitions, wells “N” state for negative controls (PCR performed in the same conditions as other samples, with the same volume of ingredients, but without DNA template). bp- base pairs.

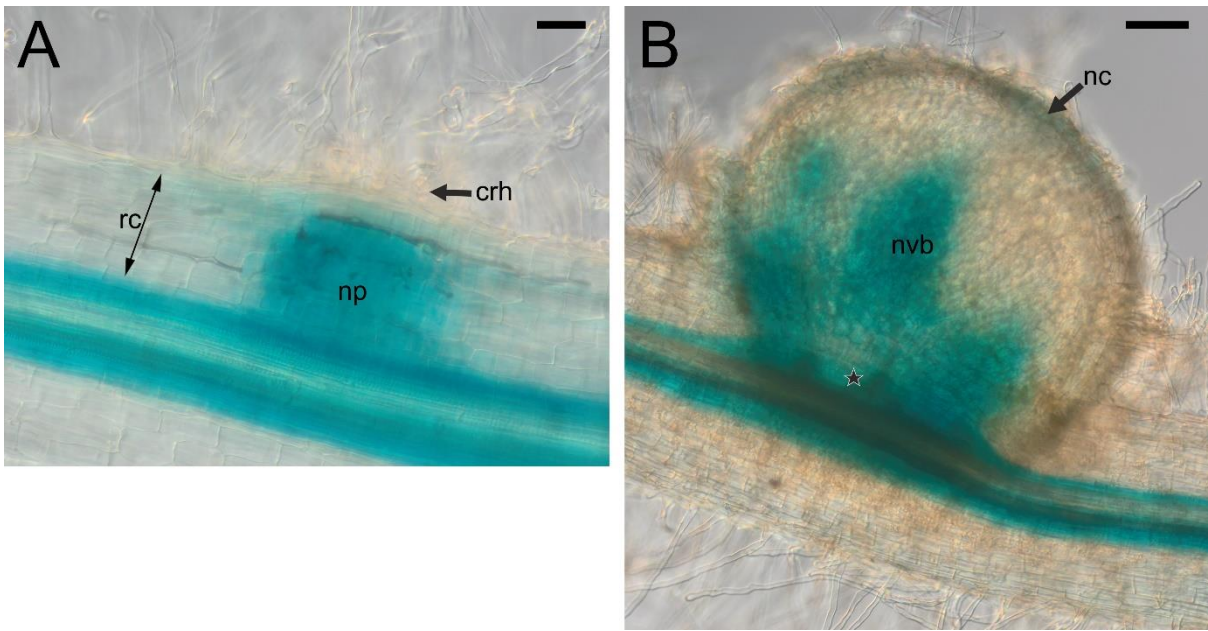

**Figure S7.** The pattern of *LjPIN1* expression in the "hidden" (A) and "emerged" (B) root nodule primordia. Labels: crh – curled root hair; nc – nodule cortex; np – nodule primordium; nvb – nodule vascular bundle; rc – root primary cortex; asterisk – vascular connection with the root stele within the nodule base. Bars: 50  $\mu\text{m}$  (A), 100  $\mu\text{m}$  (B).



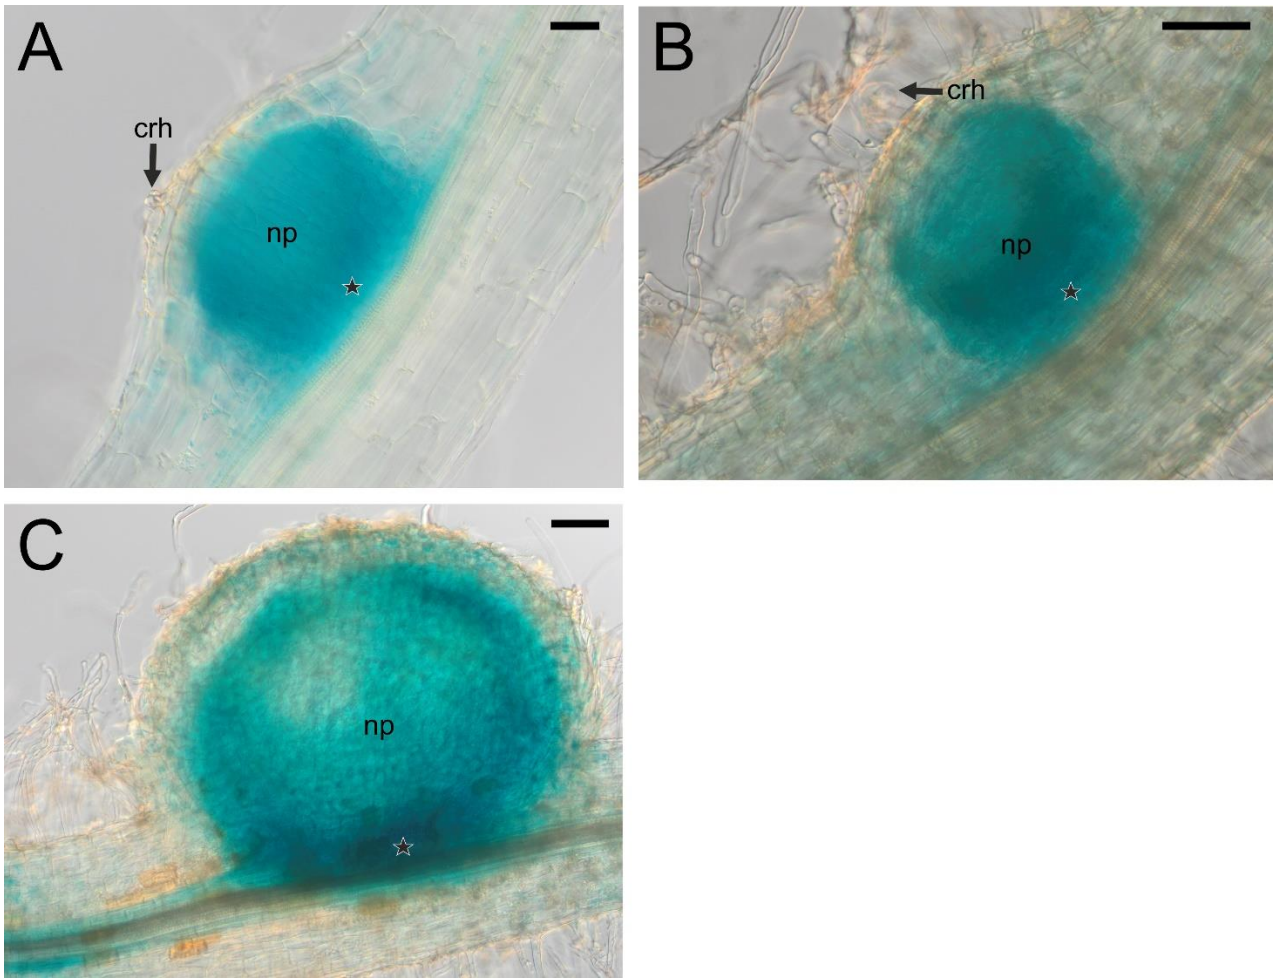

**Figure S8.** The pattern of *LjPIN2* expression in the "hidden" (A, B) and "emerged" (C) root nodule primordia. Labels: crh – curled root hair; np – nodule primordium; nvb – nodule vascular bundle; asterisk – vascular connection with the root stele within the nodule base. Bars: 50  $\mu\text{m}$  (A), 100  $\mu\text{m}$  (B, C).



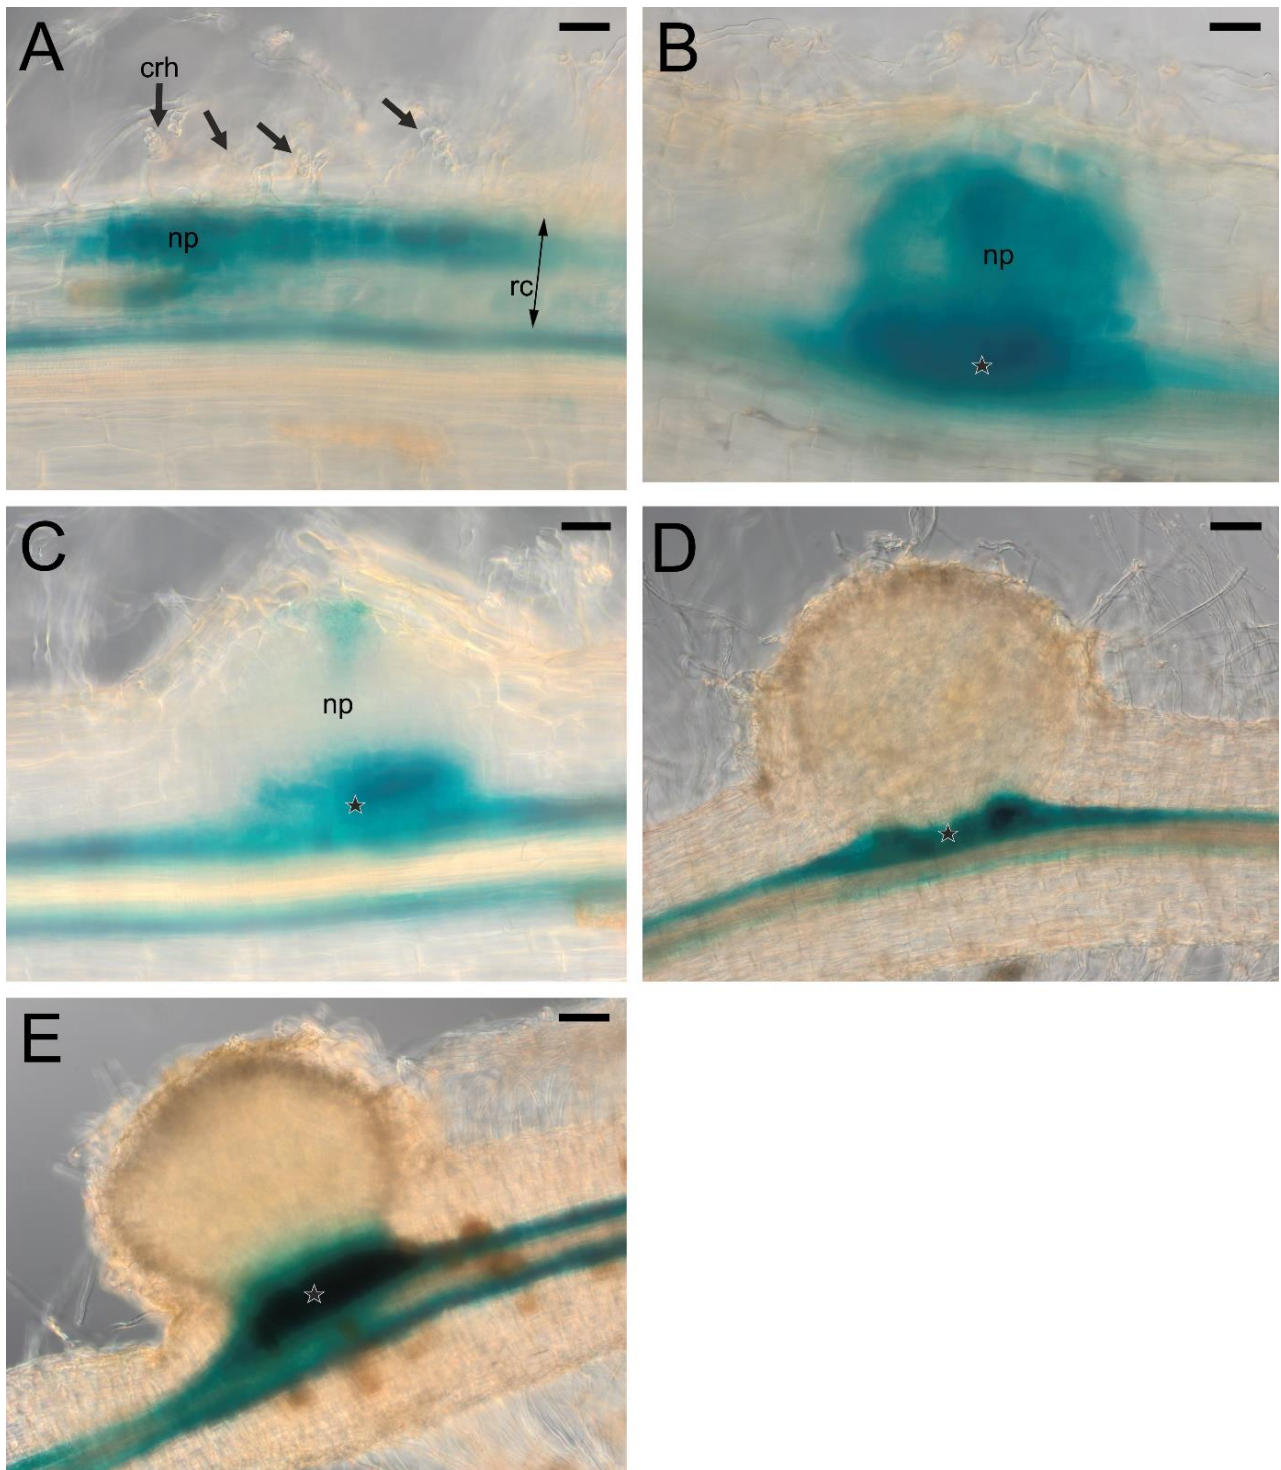

**Figure S9.** The pattern of *LjPIN3* expression in the initial (A), "hidden" (B), "emerging" (C) and "emerged" (D) root nodule primordia and in juvenile, 20 dpi, nodules (E). Labels: crh – curled root hair; np – nodule primordium; rc – root primary cortex; asterisk – vascular connection with the root stele within the nodule base. Bars: 50  $\mu$ m (A-C), 100  $\mu$ m (D, E).

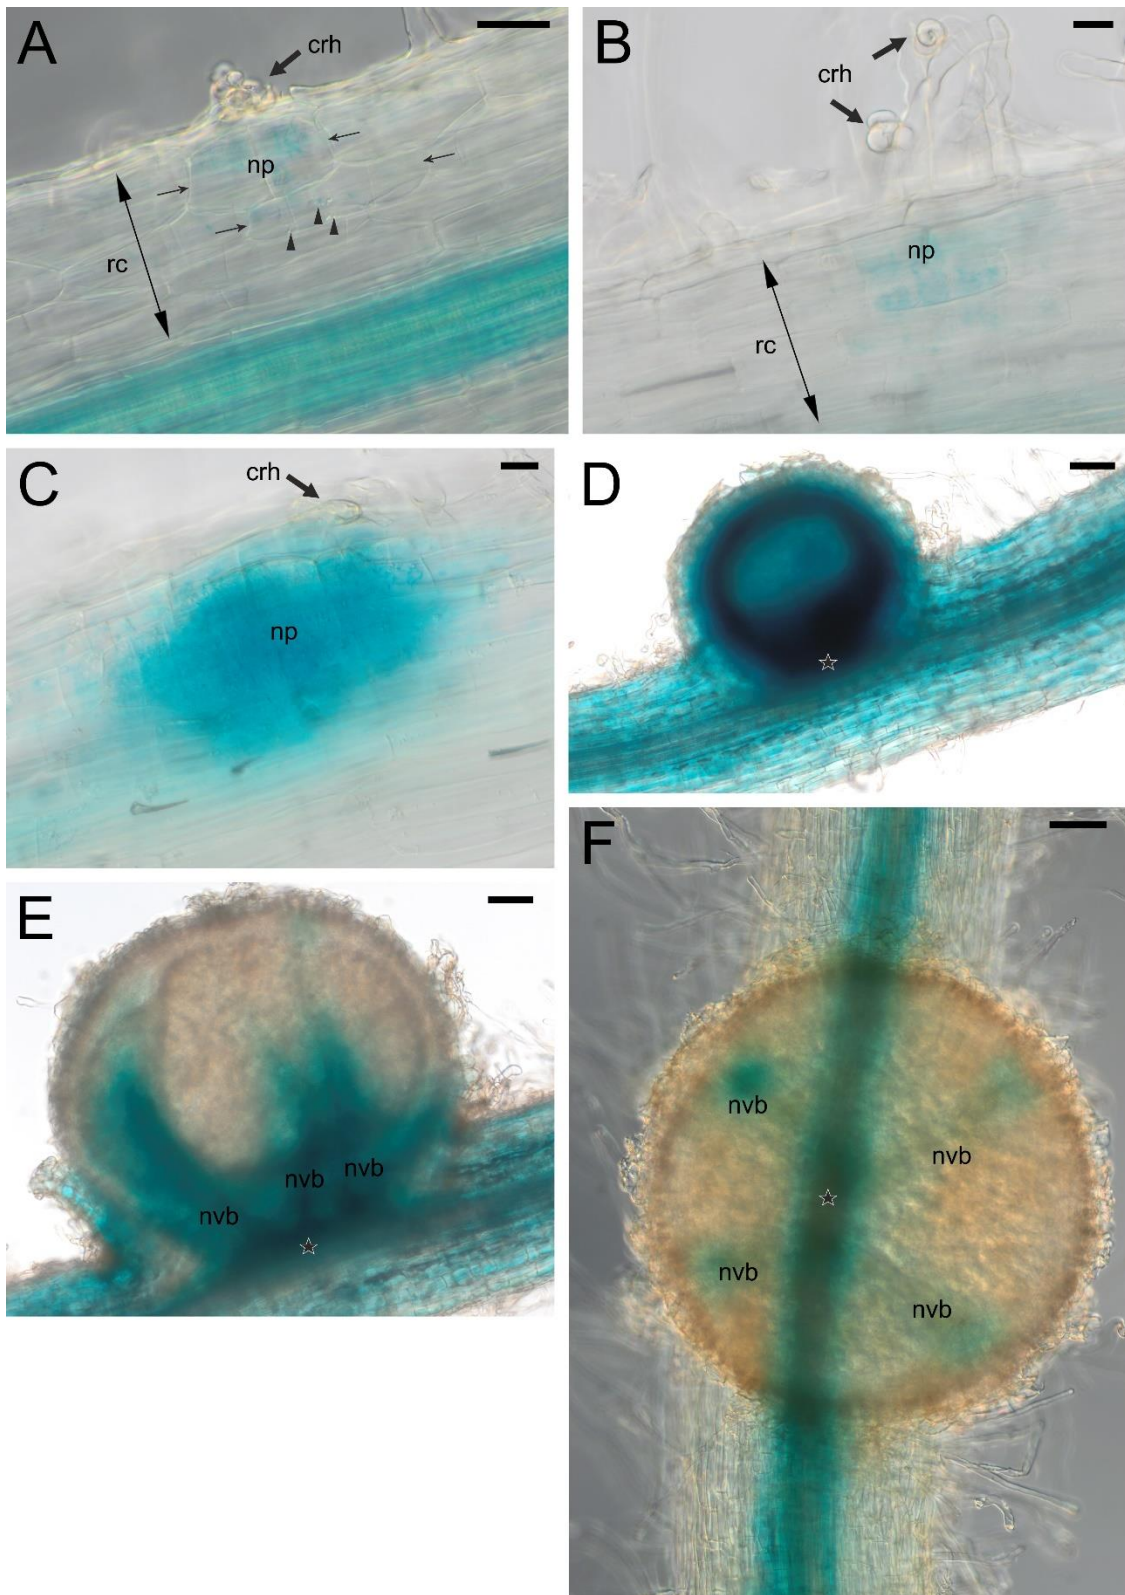

**Figure S10.** The pattern of *LjPIN4* expression in the initial (A, B, C) and “emerged” (D) root nodule primordia and in juvenile, 20 dpi, nodules (E, F).

Labels: crh – curled root hair; np – nodule primordium; nvb – nodule vascular bundle; rc – root primary cortex; thin black arrows – divided cells of root cortex constituting initial primordium of the nodule; arrowheads – starch grains; asterisk – vascular connection with the root stele within the nodule base. Bars: 20  $\mu\text{m}$  (B, C), 50  $\mu\text{m}$  (A), 100  $\mu\text{m}$  (D-F).



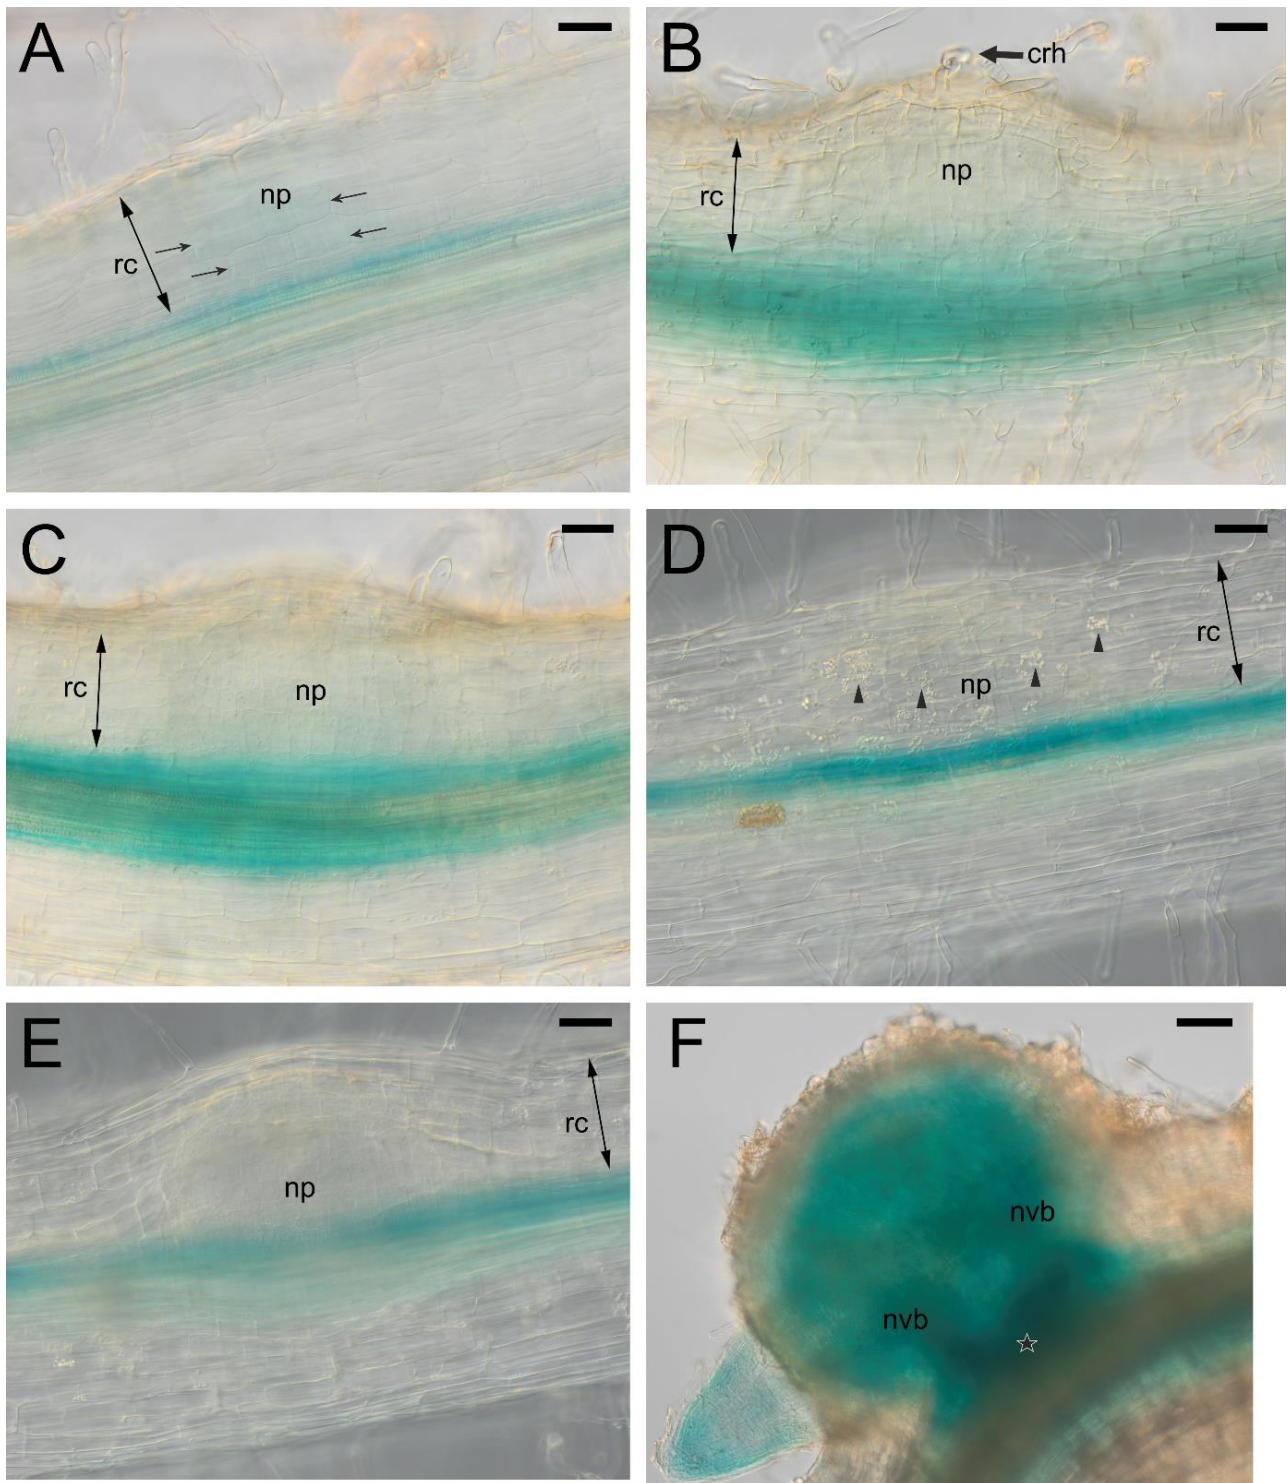

**Figure S11.** The pattern of *LjPIN5* expression in the initial (A), “hidden” (B, C, D, E) and “emerged” (F) root nodule primordia.

Labels: crh – curled root hair; np – nodule primordium; nvb – nodule vascular bundle; rc – root primary cortex; thin black arrows – divided cells of root cortex constituting initial primordium of the nodule; arrowheads – starch grains; asterisk – vascular connection with the root stele within the nodule base. Bars: 50  $\mu\text{m}$  (A-C), 100  $\mu\text{m}$  (D-F).

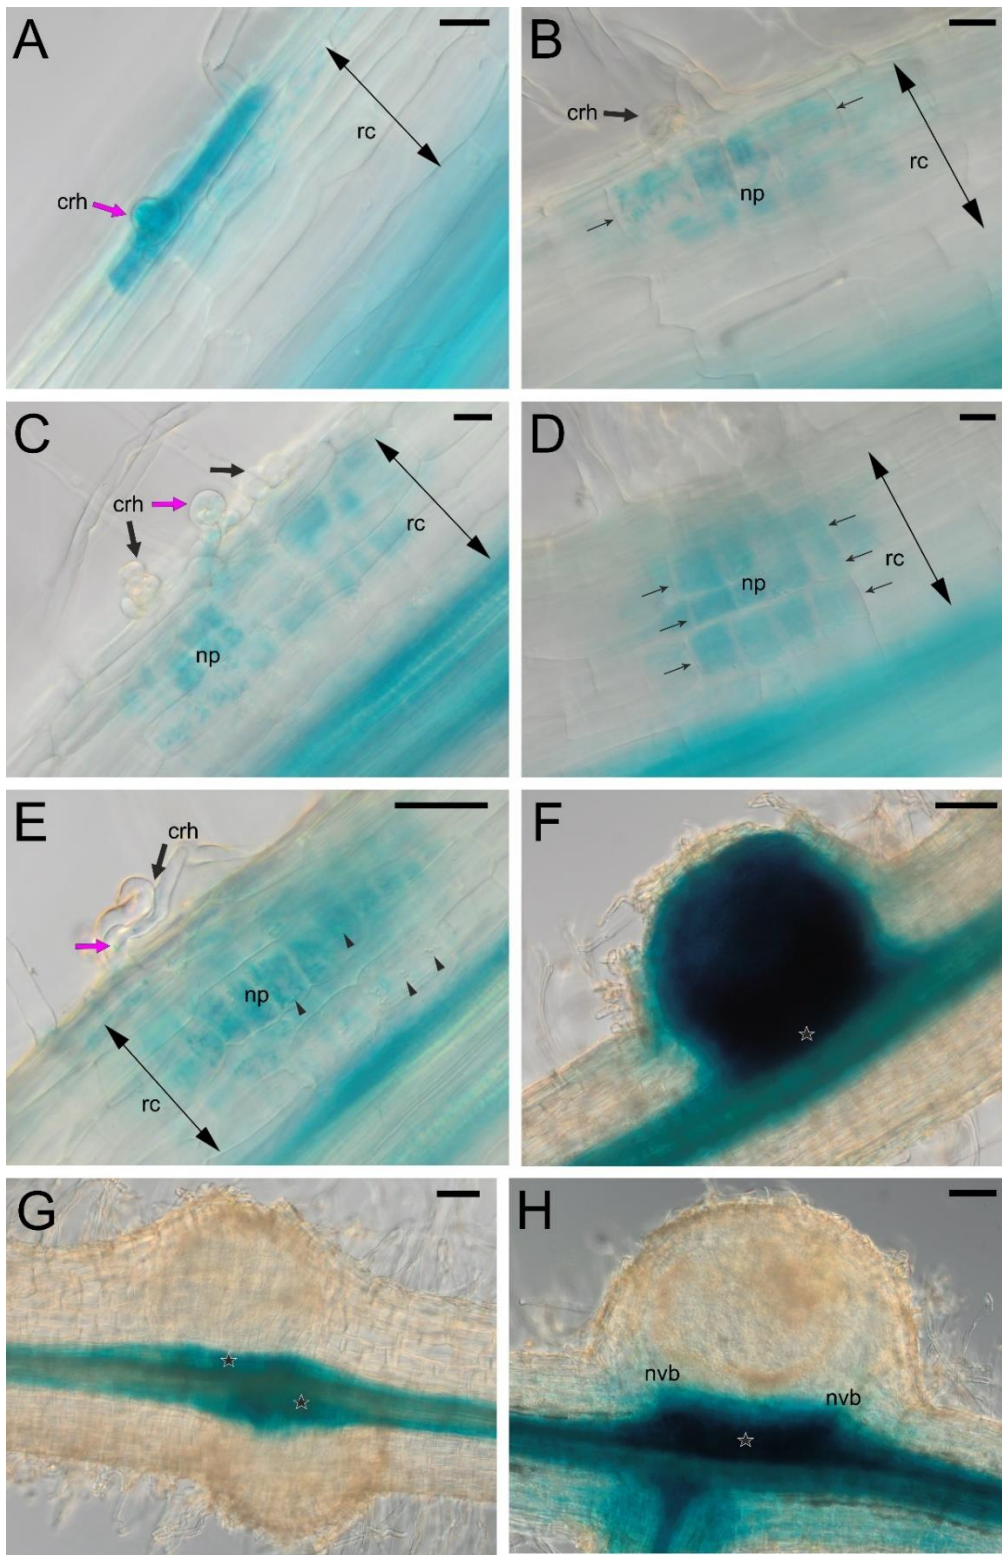

**Figure S12.** The pattern of *LjPIN6* expression in the initial (A, B, C, D, E) and “emerged” (F, G) root nodule primordia and in juvenile, 20 dpi, nodules (H).

Labels: crh – curled root hair; np – nodule primordium; nvb – nodule vascular bundle; rc – root primary cortex; pink arrow – curled root hair expressing GUS signal; thin black arrows – divided cells of root cortex constituting initial primordium of the nodule; arrowheads – starch grains; asterisk – vascular connection with the root stele within the nodule base. Bars: 20  $\mu$ m (A-D), 50  $\mu$ m (E), 100  $\mu$ m (F-H).



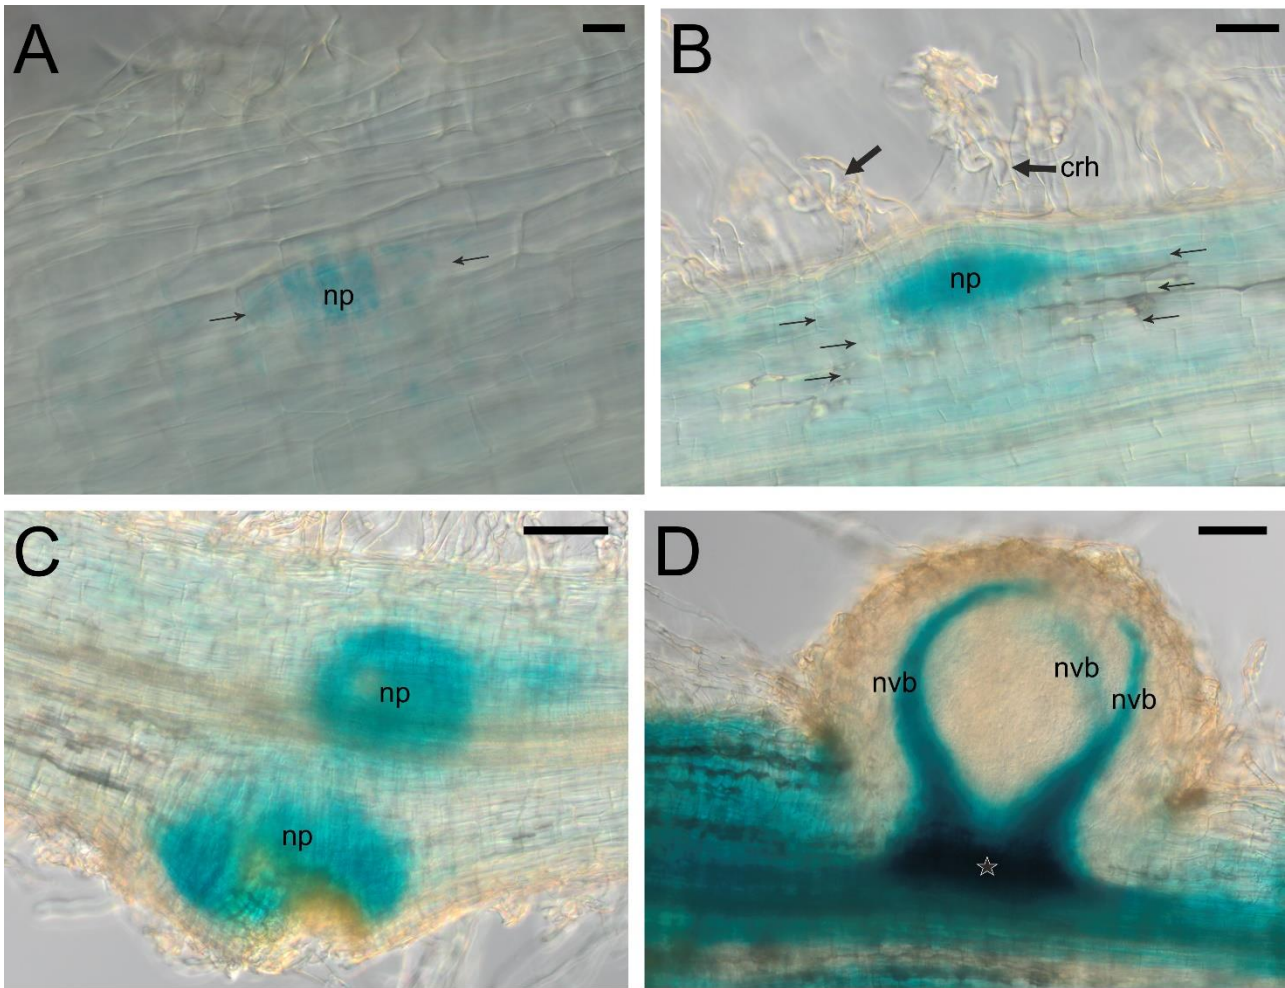

**Figure S13.** The pattern of *LjPIN7* expression in the initial (A, B), “hidden” (C) and “emerged” (D) root nodule primordia and in juvenile, 20 dpi, nodules (E).

Labels: crh – curled root hair; np – nodule primordium; nvb – nodule vascular bundle; thin black arrows – divided cells of root cortex constituting initial primordium of the nodule; asterisk – vascular connection with the root stele within the nodule base. Bars: 20  $\mu\text{m}$  (A), 50  $\mu\text{m}$  (B), 100  $\mu\text{m}$  (C, D).

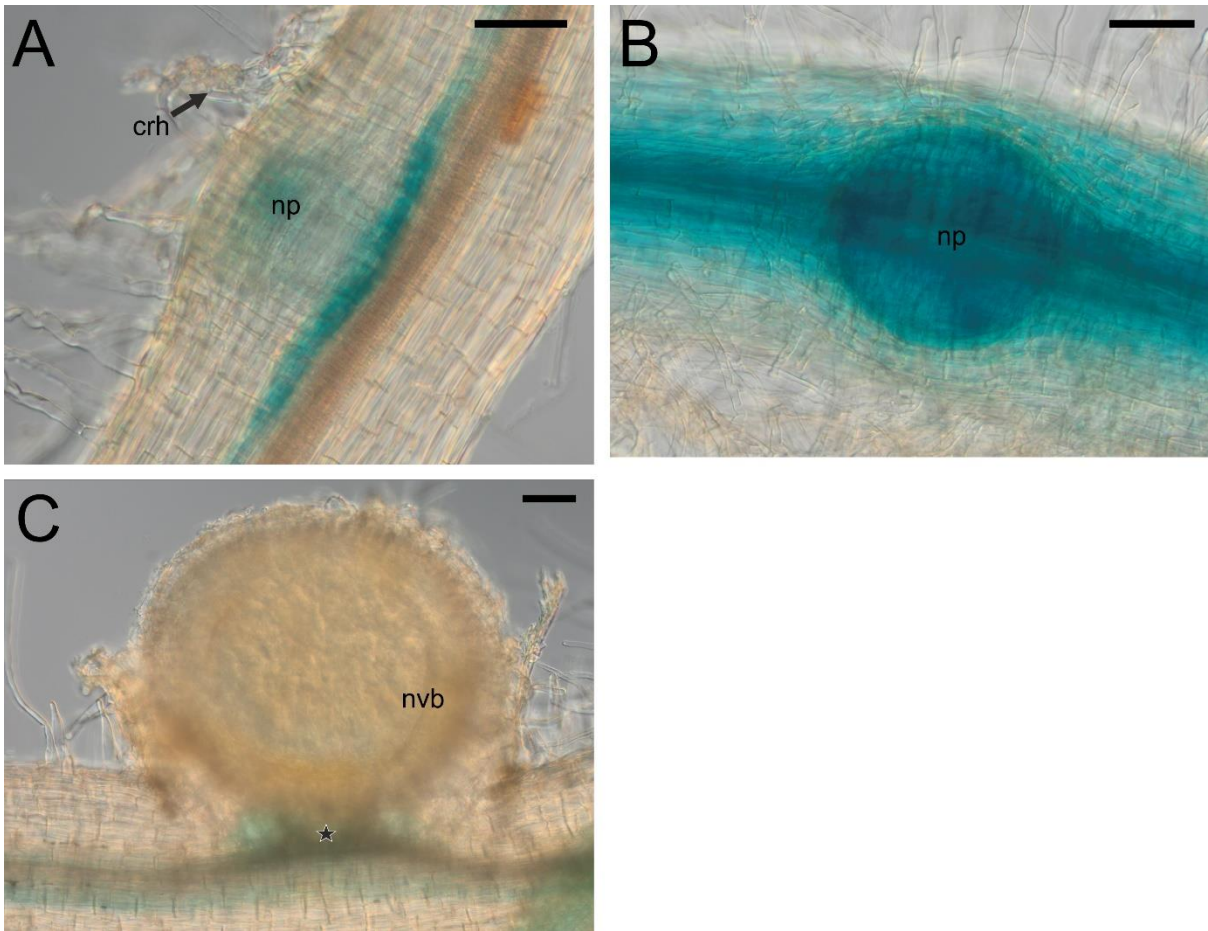

**Figure S14.** The pattern of *LjPIN8* expression in the initial (A) and "hidden" (B) root nodule primordia and in juvenile, 20 dpi, nodules (C).

Labels: crh – curled root hair; np – nodule primordium; nvb – nodule vascular bundle; asterisk – vascular connection with the root stele within the nodule base. Bars: =100 μm.



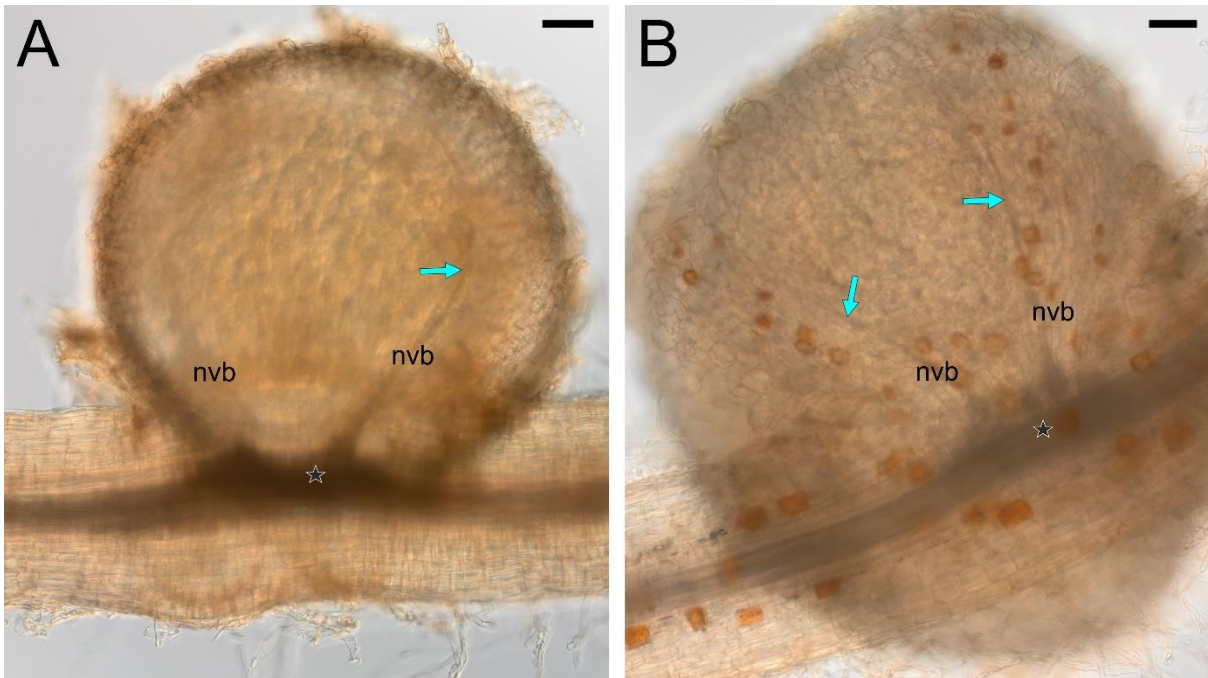

**Figure S15.** The control *L. japonicus* nodules collected from plants with adventitious roots formed after cutting off the root system (as in regular transformation process) but not transformed with *A. rhizogenes* (A), and plants transformed with non-transgenic *A. rhizogenes* (B).

Labels: nvb – nodule vascular bundle; blue arrows – files of tracheary elements in the vascular bundle; asterisk – vascular connection with the root stele within the nodule base. Bars: 100  $\mu$ m.

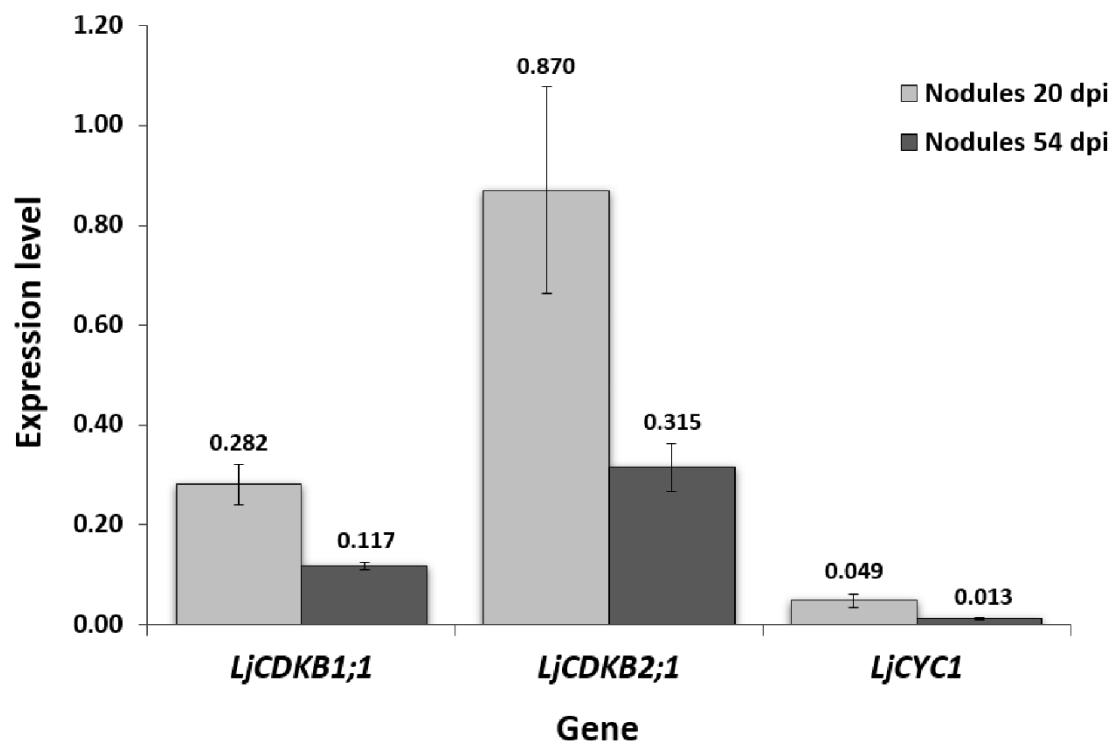

**Figure S16.** Normalized expression level of G2-M phase cell cycle markers. Mean values ( $\pm$ SE) are derived from three biological replicates, for which three individual qPCR reactions were performed.

**Table S1.** RT-PCR conditions.

| <b>Temperature</b> | <b>Time</b> |
|--------------------|-------------|
| 98 °C              | 30 s        |
| 35 cycles:         |             |
| 98 °C              | 10 s        |
| 59.5 °C            | 30 s        |
| 72 °C              | 1 min       |
| 72 °C              | 10 min      |

**Table S2.** Real-time qPCR conditions.

| <b>Temperature</b> | <b>Time</b> |
|--------------------|-------------|
| PCR                |             |
| 50 °C              | 20 s        |
| 95 °C              | 10 min      |
| 40 cycles:         |             |
| 95 °C              | 15 s        |
| 60 °C              | 1 min       |
| Melting curve      |             |
| 95 °C              | 15 s        |
| 60 °C              | 1 min       |
| 95 °C              | 30 s        |
| 60 °C              | 15 s        |

**Table S3.** Accessions of genes, sequences of primers and product lengths for real-time qPCR. bp - base pairs.

| Gene / ID                             | Forward primer sequence<br>5' → 3' | Reverse primer sequence<br>5' → 3' | Product length<br>[bp] |
|---------------------------------------|------------------------------------|------------------------------------|------------------------|
| <i>LjPIN1</i><br>(Lj4g3v3114900.1)    | ATACTCTCTACAATCCTCAAGGAACC         | GTTCCACCAGAAATAGCATCATAGT          | 150                    |
| <i>LjPIN2</i><br>(Lj4g3v2139970.1)    | CCCACTATTGTAAAAGGTTCCATC           | AGCCATAGAAAATGTTGCTACAGA           | 138                    |
| <i>LjPIN3</i><br>(Lj0g3v0320849.2)    | ATCGCTATGTACGGCGATTACT             | GGAGTCAACCTTGAATGACACAAT           | 174                    |
| <i>LjPIN4</i><br>(Lj4g3v0633470.1)    | ATTTCTTACAGGTCCTGCAGTTATG          | GGTAGAGCTATCAACATCCCAAATA          | 192                    |
| <i>LjPIN5</i><br>(Lj1g3v2809230.1)    | TCGCCCTGTTTTAGGCTAC                | TATCGCATCGCACTGTTCTC               | 71                     |
| <i>LjPIN6a</i><br>(Lj0g3v0178829.1)   | CTCTATATTCGCAATGCTGGTAG            | CTATGATGAACCTTAGCGTCCATCTC         | 174                    |
| <i>LjPIN6b</i><br>(Lj1g3v0264160.1)   | GAAAACCTTCGCGTAACCCTAATA           | CATGAAAAGCCCTAAGCTAAACAT           | 167                    |
| <i>LjPIN7</i><br>(Lj1g3v4106960.1)    | GCTAGTGTGTCATGACTAGGCTCATTT        | GCCTGCATCAGATAGAATTGATATT          | 171                    |
| <i>LjPIN8</i><br>(Lj2g3v1034600.1)    | ATAACCGGTCTATCATGTGCAACAC          | TGTAGCTCCTGAGAAGTCTCACTTT          | 242                    |
| <i>LjCDKB1;1</i><br>(Lj3g3v2061650.1) | CGATCTCAAGAAATACATCGATACC          | TACAGAGCTGAAACAGAAAACCTCTGAA       | 95                     |
| <i>LjCDKB2;1</i><br>(Lj5g3v0279150.1) | AGGAACTTATGGGAAGGTGTATAGG          | TGTTTAACATCCATTAACCTGACAA          | 180                    |
| <i>LjCYC1</i><br>(Lj2g3v1645400.1)    | CATATGTTTTTCATGAGAAGGTTCTTA        | CATACTCAACTAGAGACAGCTCAACC         | 99                     |
| <i>LjPP2AA1</i><br>(Lj2g3v1155670)    | GCAGTGCTTATAGACGAGCTGA             | TGGATAGCTTGCGAATTGAG               | 70                     |
| <i>LjPP2AA2</i><br>(Lj2g3v0742070)    | TCGACGAGTTGAAGAACGAG               | GTGTCCTCTCCTACCAAGC                | 93                     |

**Table S4.** PCR conditions.

| <b>Temperature</b> | <b>Time</b> |
|--------------------|-------------|
| 95 °C              | 5 min       |
| 40 cycles:         |             |
| 95 °C              | 30 s        |
| 60 °C              | 30 s        |
| 72 °C              | 30 s        |
| 72 °C              | 5 min       |



**Table S5.** Sequences of primers for promoter amplification. Shaded parts of the sequence represent fragments for Gateway cloning, while underlined nucleotides in the primers for elongation PCR show complementarity to the template.

|                                                             | Forward primer sequence<br>5' → 3'               | Reverse primer sequence<br>5' → 3'              | Position of promoters                    |
|-------------------------------------------------------------|--------------------------------------------------|-------------------------------------------------|------------------------------------------|
| <i>pLjPIN1</i>                                              | AAAAAGCAGGCTCCTAAACCATTGTT<br>CCGATCTTAC         | AGAAAGCTGGGTCCTTCTCACTTCGGT<br>AGAGAAACA        | Chromosome 4<br>42168645..42170156       |
| <i>pLjPIN2</i>                                              | AAAAAGCAGGCTCCATAGGGAACCT<br>CCTAGATCG           | AGAAAGCTGGGTCGGCTAAACCAAG<br>GTTGTTGT           | Chromosome 4 (-)<br>29544633..29546630   |
| <i>pLjPIN3</i> , PCRI                                       | AAAAAGCAGGCTCCTCCCATGAGTCA<br>AGTTATCC           | GTACTCAAAGAGGAATAAGAGGAG                        | -                                        |
| <i>pLjPIN3</i> , PCRII                                      | AAAAAGCAGGCTCCTCCCATGAGTCA<br>AGTTATCC           | AGAAAGCTGGGTCCTTTTTTTTGTGG<br>GTTTTA            | Chromosome 0 (-)<br>167444230..167446018 |
| <i>pLjPIN4</i>                                              | AAAAAGCAGGCTCCAAGAATAAGCC<br>TCTCGTTTCTCAA       | AGAAAGCTGGGCTTTCTTTATATGGC<br>CAAAAAAAG         | Chromosome 4<br>10020316..10021906       |
| <i>pLjPIN5</i> , PCRI                                       | AAAAAGCAGGCTCCTATGATGATGT<br>CCAAGCTGA           | GAGAAGCAAAGTGAGCCATA                            | -                                        |
| <i>pLjPIN5</i> , PCRII                                      | AAAAAGCAGGCTCCTATGATGATGTC<br>CAAGCTGA           | AGAAAGCTGGGTCCTTTTTTAATTTT<br>TTTCTTGCTCTCG     | Chromosome 1 (-)<br>31944557..31946536   |
| <i>pLjPIN6</i>                                              | AATTCTAAGGTGGGGTGGTTAAAAA                        | CTTTGAGTGAGATAGAAAGTGGTGT                       | Chromosome 1<br>Unmapped region          |
| <i>pLjPIN7</i>                                              | AAAAAGCAGGCTCCAGAAATTTAAA<br>ACCCACAATTCCA       | AGAAAGCTGGGCTTGTTTTAGCAGA<br>AACAATCACT         | Chromosome 1<br>48774196..48776085       |
| <i>pLjPIN8</i>                                              | AAAAAGCAGGCTCCTTCATACAGAAT<br>CACCACGA           | AGAAAGCTGGGTCGATTCCTAAGTAT<br>TGAAAGA           | Chromosome 2 (-)<br>16542704..16544503   |
| Elongation<br>PCR <i>pLjPIN6</i>                            | GGGGACAAGTTTGTACAAAAAAGCA<br>GGCTCCAATTCTAAGGTGG | GGGACCACTTTGTACAAGAAAGCTG<br>GGTCTTTTGAGTGAGATA | -                                        |
| Elongation<br>PCR<br><i>pLjPIN1-5</i> ,<br><i>pLjPIN7-8</i> | GGGGACAAGTTTGTACAAAAAAGCA<br><u>GGCT</u>         | GGGACCACTTTGTACAAGAAAGCTG<br><u>GGT</u>         | -                                        |

**Table S6.** Conditions of promoter regions amplification.

| Temperature                                              | Time  |
|----------------------------------------------------------|-------|
| 98 °C                                                    | 5 min |
| 35 cycles:                                               |       |
| 98 °C                                                    | 30 s  |
| 58 °C – <i>pLjPIN6</i>                                   |       |
| 60 °C – <i>pLjPIN</i> : 2, 3, 8 (PCRI, PCRII), 5 (PCRII) | 30 s  |
| 66 °C – <i>pLjPIN</i> : 1, 4, 7                          |       |
| 70 °C – <i>pLjPIN5</i> (PCRI)                            |       |
| 72 °C                                                    | 1 min |
| 72 °C                                                    | 5 min |

**Table S7.** Conditions of promoter regions elongation with *att* sequences.

| <b>Temperature</b> | <b>Time</b> |
|--------------------|-------------|
| 98 °C              | 30 s        |
| 30 cycles:         |             |
| 98 °C              | 10 s        |
| 60 °C              | 30 s        |
| 72 °C              | 1 min       |
| 72 °C              | 5 min       |
